# Supplementary material for: Fire-human-climate interactions in the Bolivian Amazon rainforest ecotone from the Last Glacial Maximum to late Holocene
Source: Frontiers journal article supplement (doi:10.3389/fearc.2023.1208985), 2023-12-11
Supplement: downloadfile [file 1208985]

## *Supplementary Material*

### **Fire-Human-Climate Interactions in the Bolivian Amazon Rainforest Ecotone from the Last Glacial Maximum to late Holocene**

**S. Yoshi Maezumi<sup>1,2\*</sup>, Mitchell J. Power<sup>3,4</sup>, Richard J. Smith<sup>5</sup>, Kendra K. McLauchlan<sup>6</sup>, Andrea R. Brunelle<sup>4</sup>, Christopher Carleton<sup>1</sup>, Andrea U. Kay<sup>1</sup>, Patrick Roberts<sup>1,7</sup>, Francis E. Mayle<sup>5</sup>**

\* **Correspondence:** Corresponding Author: S. Yoshi Maezumi: [maezumi@gea.mpg.de](mailto:maezumi@gea.mpg.de)

### **1 Supplementary Figures and Tables**

Table S1: List of the accelerator mass spectrometry radiocarbon dates from the Cuatro Vientos sediment core

| Laboratory code | Sample depth (cm below zero) | Dated Material | AMS 14C age (yr BP $\pm$ 1 $\sigma$ ) | Calibrated age range (cal. yr BP) $\pm$ 2 $\sigma$ |
|-----------------|------------------------------|----------------|---------------------------------------|----------------------------------------------------|
| UGAMS<br>13197  | 161.5                        | Bulk sediment  | 3760 $\pm$ 25                         | 4231 – 3990                                        |
| Beta-467884     | 195                          | Plant remains  | 4400 $\pm$ 30                         | 5211 – 4866                                        |
| UGAMS<br>11809  | 229                          | Bulk sediment  | 5750 $\pm$ 30                         | 6639 – 6468                                        |
| A20294          | 231.5                        | Bulk sediment  | 6800 $\pm$ 26                         | 7678 – 7593                                        |
| Beta-467885*    | 240                          | Plant remains  | 4640 $\pm$ 30                         | 5465 – 5307                                        |
| Beta-467886     | 250                          | Bulk sediment  | 9180 $\pm$ 30                         | 10477 – 10245                                      |
| UGAMS<br>15265  | 260                          | Bulk sediment  | 16140 $\pm$ 40                        | 19637 – 19295                                      |
| Beta-467887*    | 276                          | Bulk sediment  | 25700 $\pm$ 90                        | 30276 – 29502                                      |
| UGAMS<br>15157  | 292                          | Bulk sediment  | 21070 $\pm$ 50                        | 25607 – 25216                                      |

\*dates not included in age-depth model

Table S2: List of the accelerator mass spectrometry radiocarbon dates from the Laguna Chaplin sediment core

| Laboratory code | Sample depth (cm below zero) | Dated Material | AMS 14C age (yr BP $\pm 1\sigma$ ) | Calibrated age range (cal. yr BP) $\pm 2\sigma$ |
|-----------------|------------------------------|----------------|------------------------------------|-------------------------------------------------|
| Beta-137570     | 36.5                         | Bulk sediment  | 710 $\pm$ 50                       | 732 – 558                                       |
| AA39700         | 51.5                         | Bulk sediment  | 2240 $\pm$ 40                      | 2342 – 2153                                     |
| AA39701         | 69.5                         | Bulk sediment  | 2740 $\pm$ 40                      | 2925 – 2760                                     |
| AA39702         | 85                           | Bulk sediment  | 3870 $\pm$ 50                      | 4421 – 4151                                     |
| AA39703         | 100                          | Bulk sediment  | 4330 $\pm$ 80                      | 5284 – 4648                                     |
| AA39704         | 125                          | Bulk sediment  | 6040 $\pm$ 50                      | 7143 – 6745                                     |
| AA39705         | 135                          | Bulk sediment  | 9000 $\pm$ 100                     | 10404 – 9770                                    |
| AA39706         | 155                          | Bulk sediment  | 17820 $\pm$ 140                    | 21945 – 21135                                   |
| AA39707         | 175                          | Bulk sediment  | 31060 $\pm$ 440                    | 35941 – 34190                                   |
| AA39708         | 195                          | Bulk sediment  | 34820 $\pm$ 700                    | 41160 – 37945                                   |
| AA39709         | 213                          | Bulk sediment  | 37750 $\pm$ 970                    | 43801 – 40455                                   |
| AA39710*        | 250                          | Bulk sediment  | 43400 $\pm$ 1900                   | -                                               |
| AA39711*        | 285                          | Bulk sediment  | 41200 $\pm$ 1400                   | -                                               |
| AA39712*        | 296                          | Bulk sediment  | 38100 $\pm$ 1000                   | -                                               |

\*dates not included in age-depth model

Table S3: List of the accelerator mass spectrometry radiocarbon dates from the Huanchaca Mesetta sediment core

| Laboratory code | Depth (cm below zero) | Dated Material | AMS 14C age (yr BP $\pm 1\sigma$ ) | Calibrated age range (cal. yr BP) $\pm 2\sigma$ |
|-----------------|-----------------------|----------------|------------------------------------|-------------------------------------------------|
| UGAMS 15158     | 17                    | Macrofossil    | 190 $\pm$ 20                       | 0 – 289                                         |
| UGAMS 17252*    | 58                    | Bulk sediment  | 2310 $\pm$ 25                      | 2211 – 2356                                     |
| UGAMS 15264     | 118                   | Bulk sediment  | 1360 $\pm$ 20                      | 1272 – 1305                                     |
| UGAMS 12023     | 190                   | Bulk sediment  | 2480 $\pm$ 20                      | 2473 – 2715                                     |
| UGAMS 17253     | 225                   | Bulk sediment  | 3365 $\pm$ 25                      | 3561 – 3589                                     |
| UGAMS 17254     | 277                   | Bulk sediment  | 6545 $\pm$ 30                      | 7422 – 9622                                     |
| UGAMS 15159     | 320                   | Bulk sediment  | 8600 $\pm$ 30                      | 9524 – 9622                                     |
| UGAMS 17255     | 380                   | Bulk sediment  | 11905 $\pm$ 35                     | 13577-13789                                     |

\*dates not included in age-depth model

Table S4: List of Regional Archaeological dates used to calculate SPD and RECE curves

| Country | Site name     | Latitude | Longitude | Labcode | Date BP | error | Reference    |
|---------|---------------|----------|-----------|---------|---------|-------|--------------|
| Bolivia | Abrigo do Sol | -13.82   | -59.63    | N-2359  | 14700   | 195   | Miller, 1987 |
| Bolivia | Abrigo do Sol | -13.82   | -59.63    | SI-3738 | 14470   | 450   | Miller, 1987 |
| Bolivia | Abrigo do Sol | -13.82   | -59.63    | SI-3477 | 12300   | 95    | Miller, 1987 |
| Bolivia | Abrigo do Sol | -13.82   | -59.63    | N-3226  | 11800   | 110   | Miller, 1987 |
| Bolivia | Abrigo do Sol | -13.82   | -59.63    | N-3055  | 11600   | 115   | Miller, 1987 |
| Bolivia | Abrigo do Sol | -13.82   | -59.63    | N-3225  | 11300   | 140   | Miller, 1987 |
| Bolivia | Abrigo do Sol | -13.82   | -59.63    | N-3223  | 10600   | 130   | Miller, 1987 |
| Bolivia | Abrigo do Sol | -13.82   | -59.63    | SI-3476 | 10405   | 100   | Miller, 1987 |
| Bolivia | Abrigo do Sol | -13.82   | -59.63    | SI-3737 | 9775    | 70    | Miller, 1987 |
| Bolivia | Abrigo do Sol | -13.82   | -59.63    | SI-3227 | 9410    | 120   | Miller, 1987 |
| Bolivia | Abrigo do Sol | -13.82   | -59.63    | SI-3479 | 9370    | 70    | Miller, 1987 |
| Bolivia | Abrigo do Sol | -13.82   | -59.63    | SI-3739 | 9245    | 120   | Miller, 1987 |
| Bolivia | Abrigo do Sol | -13.82   | -59.63    | SI-3482 | 9115    | 160   | Miller, 1987 |
| Bolivia | Abrigo do Sol | -13.82   | -59.63    | SI-3736 | 8930    | 100   | Miller, 1987 |
| Bolivia | Abrigo do Sol | -13.82   | -59.63    | SI-3475 | 7970    | 75    | Miller, 1987 |
| Bolivia | Abrigo do Sol | -13.82   | -59.63    | N-3059  | 7950    | 115   | Miller, 1987 |
| Bolivia | Abrigo do Sol | -13.82   | -59.63    | SI-3481 | 7875    | 85    | Miller, 1987 |
| Bolivia | Abrigo do Sol | -13.82   | -59.63    | N-2358  | 7810    | 110   | Miller, 1987 |
| Bolivia | Abrigo do Sol | -13.82   | -59.63    | SI-3740 | 7695    | 65    | Miller, 1987 |
| Bolivia | Abrigo do Sol | -13.82   | -59.63    | N-3058  | 7630    | 95    | Miller, 1987 |
| Bolivia | Abrigo do Sol | -13.82   | -59.63    | N-3224  | 7530    | 105   | Miller, 1987 |
| Bolivia | Abrigo do Sol | -13.82   | -59.63    | N-3060  | 7220    | 85    | Miller, 1987 |
| Bolivia | Abrigo do Sol | -13.82   | -59.63    | SI-3474 | 7190    | 70    | Miller, 1987 |
| Bolivia | Abrigo do Sol | -13.82   | -59.63    | N-3061  | 7130    | 85    | Miller, 1987 |
| Bolivia | Abrigo do Sol | -13.82   | -59.63    | SI-3741 | 6900    | 65    | Miller, 1987 |
| Bolivia | Abrigo do Sol | -13.82   | -59.63    | N-3057  | 6730    | 85    | Miller, 1987 |
| Bolivia | Abrigo do Sol | -13.82   | -59.63    | N-3062  | 6470    | 110   | Miller, 1987 |
| Bolivia | Abrigo do Sol | -13.82   | -59.63    | N-3222  | 6460    | 100   | Miller, 1987 |
| Bolivia | Abrigo do Sol | -13.82   | -59.63    | SI-3104 | 6130    | 65    | Miller, 1987 |
| Bolivia | Abrigo do Sol | -13.82   | -59.63    | N-3056  | 5900    | 105   | Miller, 1987 |
| Bolivia | Abrigo do Sol | -13.82   | -59.63    | SI-3473 | 5750    | 60    | Miller, 1987 |
| Bolivia | Abrigo do Sol | -13.82   | -59.63    | SI-3478 | 5730    | 60    | Miller, 1987 |
| Bolivia | Abrigo do Sol | -13.82   | -59.63    | N-2357  | 315     | 70    | Miller, 1987 |

|         |                     |            |            |           |      |    |                             |
|---------|---------------------|------------|------------|-----------|------|----|-----------------------------|
| Bolivia | Abrigo do Sol       | -13.82     | -59.63     | SI-3105   | 115  | 55 | Miller, 1987                |
| Bolivia | Balneario Quinaua   | -10.054726 | -67.616107 | Ua-37263  | 1565 | 35 | Saunaluoma and Schaan, 2012 |
| Bolivia | Balneario Quinaua   | -10.054726 | -67.616107 | Ua-37262  | 1570 | 35 | Saunaluoma and Schaan, 2012 |
| Bolivia | Balneario Quinaua   | -10.054726 | -67.616107 | Ua-37260  | 1585 | 30 | Saunaluoma and Schaan, 2012 |
| Bolivia | Balneario Quinaua   | -10.054726 | -67.616107 | Ua-37261  | 1760 | 35 | Saunaluoma and Schaan, 2012 |
| Bolivia | Bella Vista-1       | -13.2635   | -63.7066   | Erl-6559  | 2980 | 44 | Prümers et al., 2006        |
| Bolivia | Bella Vista-1       | -13.2635   | -63.7066   | Erl-6558  | 726  | 41 | Prümers et al., 2006        |
| Bolivia | Bella Vista-1       | -13.2635   | -63.7066   | Erl-6561  | 634  | 44 | Prümers et al., 2006        |
| Bolivia | Bella Vista-1       | -13.2635   | -63.7066   | Erl-6560  | 568  | 43 | Prümers et al., 2006        |
| Bolivia | Bella Vista-3       | -13.2555   | -63.6942   | KIA-40610 | 432  | 18 | Prümers 2014:84             |
| Bolivia | Bella Vista-3       | -13.2555   | -63.6942   | KIA-40611 | 470  | 27 | Prümers 2014:84             |
| Bolivia | Bella Vista-3       | -13.2555   | -63.6942   | KIA-40612 | 6939 | 30 | Prümers 2014:84             |
| Bolivia | Bermeo, San Ignacio | -14.895    | -65.377    | Poz-36133 | 1085 | 35 | saun                        |
| Bolivia | Bermeo, San Ignacio | -14.895    | -65.377    | Poz-36131 | 905  | 30 | Rodrigues et al., 2015      |
| Bolivia | Bermeo, San Ignacio | -14.895    | -65.377    | Poz-36130 | 695  | 30 | Rodrigues et al., 2015      |
| Bolivia | Bermeo, San Ignacio | -14.895    | -65.377    | Poz-39568 | 585  | 30 | Rodrigues et al., 2015      |
| Bolivia | Candelaria          | -11.0575   | -66.285    | Ua-24928  | 1700 | 40 | Saunaluoma, 2010            |
| Bolivia | Chacra Teleria      | -11.02361  | -66.285    | Ua-24931  | 1940 | 40 | Saunaluoma, 2010            |
| Bolivia | El Cerro            | -13.23447  | -65.4123   | 117220    | 610  | 70 | Walker, 2004                |
| Bolivia | El Cerro            | -13.23447  | -65.4123   | 117218    | 480  | 50 | Walker, 2004                |
| Bolivia | El Cerro            | -13.23447  | -65.4123   | 117221    | 470  | 90 | Walker, 2004                |
| Bolivia | El Círculo          | -11.03583  | -66.12861  | Hela-570  | 1790 | 75 | Saunaluoma, 2010            |
| Bolivia | El Círculo          | -11.03583  | -66.12861  | Poz-9426  | 715  | 30 | Saunaluoma, 2010            |
| Bolivia | El Círculo          | -11.03583  | -66.12861  | Poz-9428  | 685  | 30 | Saunaluoma, 2010            |

## Supplementary Material

|         |                        |            |            |             |       |    |                              |
|---------|------------------------|------------|------------|-------------|-------|----|------------------------------|
| Bolivia | El Círculo             | -11.03583  | -66.12861  | Poz-9523    | 680   | 30 | Saunaluoma,<br>2010          |
| Bolivia | El Círculo             | -11.03583  | -66.12861  | Poz-9427    | 660   | 30 | Saunaluoma,<br>2010          |
| Bolivia | El Círculo             | -11.03583  | -66.12861  | Poz-9524    | 650   | 30 | Saunaluoma,<br>2010          |
| Bolivia | El Círculo             | -11.03583  | -66.12861  | Poz-9429    | 645   | 30 | Saunaluoma,<br>2010          |
| Bolivia | El Círculo             | -11.03583  | -66.12861  | Hel-4585    | 600   | 60 | Saunaluoma,<br>2010          |
| Bolivia | El Progreso, San Borja | -14.825    | -66.713    | BE-3265.1.1 | 2590  | 23 | Rodrigues et al.<br>2016:377 |
| Bolivia | El Progreso, San Borja | -14.825    | -66.713    | BE-3266.1.1 | 2451  | 30 | Rodrigues et al.<br>2016:377 |
| Bolivia | El Progreso, San Borja | -14.825    | -66.713    | MAM         | 790   | 70 | Rodrigues et al.,<br>2016    |
| Bolivia | El Progreso, San Borja | -14.825    | -66.713    | MAM         | 635   | 55 | Rodrigues et al.,<br>2016    |
| Bolivia | Estancia Giese         | -10.97333  | -66.01444  | Hela-707    | 10355 | 80 | Saunaluoma,<br>2010          |
| Bolivia | Estancia Giese         | -10.97333  | -66.01444  | Hela-708    | 1815  | 45 | Saunaluoma,<br>2010          |
| Bolivia | Estancia Giese         | -10.97333  | -66.01444  | Hela-709    | 1695  | 40 | Saunaluoma,<br>2010          |
| Bolivia | Estancia Girasol       | -11.18139  | -66.18389  | Ua-24929    | 475   | 35 | Saunaluoma,<br>2010          |
| Bolivia | Estancita              | -13.707105 | -65.452331 | Beta-342109 | 1010  | 30 | Walker 2014:277              |
| Bolivia | Estancita              | -13.707105 | -65.452331 | Beta-342110 | 1130  | 30 | Walker 2014:277              |
| Bolivia | Estancita              | -13.707105 | -65.452331 | Beta-342111 | 1190  | 20 | Walker 2014:277              |
| Bolivia | Estancita              | -13.707105 | -65.452331 | Beta-342112 | 1300  | 30 | Walker 2014:277              |
| Bolivia | Estancita              | -13.707105 | -65.452331 | Beta-342113 | 1150  | 30 | Walker 2014:277              |
| Bolivia | Estancita              | -13.707105 | -65.452331 | Beta-342114 | 1120  | 30 | Walker 2014:277              |
| Bolivia | Estancita              | -13.707105 | -65.452331 | Beta-342115 | 250   | 30 | Walker 2014:277              |
| Bolivia | Estancita              | -13.707105 | -65.452331 | Beta-342116 | 6920  | 40 | Walker 2014:277              |
| Bolivia | Estancita              | -13.707105 | -65.452331 | Beta-342117 | 560   | 30 | Walker 2014:277              |

|         |                       |            |            |             |      |     |                             |
|---------|-----------------------|------------|------------|-------------|------|-----|-----------------------------|
| Bolivia | Estancita             | -13.707105 | -65.452331 | Beta-342118 | 560  | 30  | Walker 2014:277             |
| Bolivia | Estancita             | -13.707105 | -65.452331 | Beta-342119 | 650  | 30  | Walker 2014:277             |
| Bolivia | Estancita             | -13.707105 | -65.452331 | Beta-342120 | 680  | 30  | Walker 2014:277             |
| Bolivia | Estancita             | -13.707105 | -65.452331 | Beta-342121 | 630  | 30  | Walker 2014:277             |
| Bolivia | Estancita             | -13.707105 | -65.452331 | Beta-342122 | 550  | 30  | Walker 2014:277             |
| Bolivia | Fazenda Atlantica     | -10.077692 | -67.575434 | Ua-37252    | 1855 | 30  | Saunaluoma and Schaan, 2012 |
| Bolivia | Fazenda Atlantica     | -10.077692 | -67.575434 | Ua-37251    | 1905 | 35  | Saunaluoma and Schaan, 2012 |
| Bolivia | Fazenda Atlantica     | -10.077692 | -67.575434 | Ua-37253    | 2110 | 35  | Saunaluoma and Schaan, 2012 |
| Bolivia | Fazenda Colorada      | -9.872496  | -67.533889 | Ua-37236    | 1340 | 35  | Schaan et al., 2012         |
| Bolivia | Fazenda Colorada      | -9.872496  | -67.533889 | Ua-37255    | 1275 | 30  | Schaan et al., 2012         |
| Bolivia | Fazenda Colorada      | -9.872496  | -67.533889 | Ua-37235    | 1865 | 65  | Schaan et al., 2012         |
| Bolivia | Fazenda Colorada      | -9.872496  | -67.533889 | Ua-37256    | 1820 | 30  | Schaan et al., 2012         |
| Bolivia | Fazenda Colorada      | -9.872496  | -67.533889 | Ua-37567    | 1775 | 35  | Schaan et al., 2012         |
| Bolivia | Fazenda Colorada      | -9.872496  | -67.533889 | Hela-616    | 750  | 35  | Schaan et al., 2012         |
| Bolivia | Galera 1              | -14.41     | -60.09     | SI-3748     | 1060 | 100 | Miller, 1977                |
| Bolivia | Galera 1              | -14.41     | -60.09     | SI-3745     | 825  | 60  | Miller, 1977                |
| Bolivia | Galera 1              | -14.41     | -60.09     | SI-3747     | 810  | 60  | Miller, 1977                |
| Bolivia | Galera 1              | -14.41     | -60.09     | SI-3746     | 790  | 60  | Miller, 1977                |
| Bolivia | Gondunovia            | -15.51507  | -65.114755 | Gd-4821     | 510  | 60  | Ziólkowski et al. 1994:82   |
| Bolivia | Granja del Padre BV-2 | -13.2626   | -63.70726  | KIA-38829   | 4526 | 36  | Prümers 2014:84             |
| Bolivia | Granja del Padre BV-2 | -13.2626   | -63.70726  | KIA-38830   | 3978 | 27  | Prümers 2014:84             |
| Bolivia | Granja del Padre BV-2 | -13.2626   | -63.70726  | KIA-38831   | 782  | 27  | Prümers 2014:84             |
| Bolivia | Granja del Padre BV-2 | -13.2626   | -63.70726  | KIA-38833   | 607  | 28  | Prümers 2014:84             |
| Bolivia | Granja del Padre BV-2 | -13.2626   | -63.70726  | KIA-48488   | 783  | 25  | Prümers 2014:84             |

## Supplementary Material

|         |                             |            |            |                 |      |     |                         |
|---------|-----------------------------|------------|------------|-----------------|------|-----|-------------------------|
| Bolivia | Granja del Padre<br>BV-2    | -13.2626   | -63.70726  | KIA-<br>48489   | 775  | 25  | Prümers 2014:84         |
| Bolivia | Isla 421                    | -13.73039  | -66.109032 | BE-<br>6159.1.1 | 5875 | 127 | Lombardo et al.<br>2020 |
| Bolivia | Isla 423                    | -13.699267 | -66.065488 | BE-<br>6157.1.1 | 4365 | 21  | Lombardo et al.<br>2020 |
| Bolivia | Isla 429                    | -13.715958 | -66.096337 | BE-<br>6158.1.1 | 8028 | 24  | Lombardo et al.<br>2020 |
| Bolivia | Isla 430                    | -13.703679 | -66.035445 | BE-<br>6168.1.1 | 6397 | 130 | Lombardo et al.<br>2020 |
| Bolivia | Isla 433                    | -13.696624 | -66.080699 | BE-<br>6163.1.1 | 7058 | 50  | Lombardo et al.<br>2020 |
| Bolivia | Isla 434                    | -13.705137 | -66.086872 | BE-<br>6167.1.1 | 7811 | 57  | Lombardo et al.<br>2020 |
| Bolivia | Isla 490 Lapiz              | -13.675453 | -62.848849 | BE-<br>6153.1.1 | 3796 | 33  | Lombardo et al.<br>2020 |
| Bolivia | Isla 493 Lapiz              | -13.709173 | -62.820346 | BE-<br>6166.1.1 | 8920 | 49  | Lombardo et al.<br>2020 |
| Bolivia | Isla 502                    | -14.491776 | -64.696794 | BE-<br>6164.1.1 | 4365 | 110 | Lombardo et al.<br>2020 |
| Bolivia | Isla 519                    | -13.492362 | -63.857297 | BE-<br>7666.1.1 | 5647 | 22  | Lombardo et al.<br>2020 |
| Bolivia | Isla 521                    | -13.485405 | -63.841101 | BE-<br>7674.1.1 | 2346 | 89  | Lombardo et al.<br>2020 |
| Bolivia | Isla 526                    | -13.44894  | -63.814933 | BE-<br>7662.1.1 | 6217 | 40  | Lombardo et al.<br>2020 |
| Bolivia | Isla 527                    | -13.442909 | -63.78463  | BE-<br>7661.1.1 | 5337 | 281 | Lombardo et al.<br>2020 |
| Bolivia | Isla 530                    | -13.49099  | -63.804663 | BE-<br>7673.2.1 | 2397 | 20  | Lombardo et al.<br>2020 |
| Bolivia | Isla 535                    | -13.458431 | -63.836521 | BE-<br>7668.2.1 | 6069 | 51  | Lombardo et al.<br>2020 |
| Bolivia | Isla 536                    | -13.43808  | -63.833632 | BE-<br>7664.1.1 | 4994 | 37  | Lombardo et al.<br>2020 |
| Bolivia | Isla 569                    | -13.663595 | -66.011151 | BE-<br>7672.1.1 | 5759 | 53  | Lombardo et al.<br>2020 |
| Bolivia | Isla 569                    | -13.663595 | -66.011151 | BE-<br>7675.1.1 | 407  | 19  | Lombardo et al.<br>2020 |
| Bolivia | Isla 570                    | -13.66441  | -66.008131 | BE-<br>7667.1.1 | 6046 | 48  | Lombardo et al.<br>2020 |
| Bolivia | Isla 574                    | -13.679195 | -66.020625 | BE-<br>7671.1.1 | 5516 | 62  | Lombardo et al.<br>2020 |
| Bolivia | Isla 575 Hotel<br>Caracoles | -14.115805 | -66.777616 | BE-<br>7663.1.1 | 8849 | 50  | Lombardo et al.<br>2020 |



|         |                        |            |            |                 |      |    |                          |
|---------|------------------------|------------|------------|-----------------|------|----|--------------------------|
| Bolivia | Isla del Tesoro<br>SM1 | -14.788163 | -64.644784 | Poz-36135       | 9420 | 50 | Lombardo et al.,<br>2013 |
| Bolivia | Isla del Tesoro<br>SM1 | -14.788163 | -64.644784 | Poz-34301       | 9270 | 60 | Lombardo et al.,<br>2013 |
| Bolivia | Isla del Tesoro<br>SM1 | -14.788163 | -64.644784 | Poz-36136       | 5800 | 35 | Lombardo et al.,<br>2013 |
| Bolivia | Isla del Tesoro<br>SM1 | -14.788163 | -64.644784 | PSUAMS-<br>4658 | 5565 | 20 | Capriles et al.<br>2019  |
| Bolivia | Isla del Tesoro<br>SM1 | -14.788163 | -64.644784 | Poz-22902       | 5520 | 40 | Lombardo et al.,<br>2013 |
| Bolivia | Isla del Tesoro<br>SM1 | -14.788163 | -64.644784 | Poz-34231       | 5520 | 40 | Lombardo et al.,<br>2013 |
| Bolivia | Isla del Tesoro<br>SM1 | -14.788163 | -64.644784 | Poz-24634       | 5505 | 35 | Lombardo et al.,<br>2013 |
| Bolivia | Isla del Tesoro<br>SM1 | -14.788163 | -64.644784 | Poz-34232       | 5460 | 40 | Lombardo et al.,<br>2013 |
| Bolivia | Isla del Tesoro<br>SM1 | -14.788163 | -64.644784 | Poz-24633       | 5360 | 40 | Lombardo et al.,<br>2013 |
| Bolivia | Isla del Tesoro<br>SM1 | -14.788163 | -64.644784 | D-AMS-<br>1740  | 5502 | 30 | Lombardo et al.,<br>2013 |
| Bolivia | Isla del Tesoro<br>SM1 | -14.788163 | -64.644784 | Poz-34230       | 4945 | 35 | Lombardo et al.,<br>2013 |
| Bolivia | Isla del Tesoro<br>SM1 | -14.788163 | -64.644784 | Poz-28850       | 4495 | 35 | Lombardo et al.,<br>2013 |
| Bolivia | Isla del Tesoro<br>SM1 | -14.788163 | -64.644784 | Poz-58856       | 4480 | 40 | Lombardo et al.,<br>2013 |
| Bolivia | Isla del Tesoro<br>SM1 | -14.788163 | -64.644784 | Poz-28855       | 4415 | 35 | Lombardo et al.,<br>2013 |
| Bolivia | Isla del Tesoro<br>SM1 | -14.788163 | -64.644784 | Poz-34229       | 3895 | 35 | Lombardo et al.,<br>2013 |
| Bolivia | Isla del Tesoro<br>SM1 | -14.788163 | -64.644784 | Poz-28854       | 3830 | 50 | Lombardo et al.,<br>2013 |
| Bolivia | Isla del Tesoro<br>SM1 | -14.788163 | -64.644784 | PSUAMS-<br>4657 | 1665 | 15 | Capriles et al.<br>2019  |
| Bolivia | Isla del Tesoro<br>SM1 | -14.788163 | -64.644784 | Poz-34228       | 345  | 25 | Lombardo et al.,<br>2013 |
| Bolivia | Isla del Tesoro<br>SM1 | -14.788163 | -64.644784 | D-AMS<br>32885  | 7271 | 40 | Lombardo et al.<br>2020  |
| Bolivia | Isla del Tesoro<br>SM1 | -14.788163 | -64.644784 | D-AMS<br>32884  | 7447 | 37 | Lombardo et al.<br>2020  |
| Bolivia | Isla FIN12             | -14.461887 | -64.659193 | BE-<br>4255.1.1 | 4092 | 24 | Lombardo et al.<br>2020  |
| Bolivia | Isla FIN14             | -14.436565 | -64.772352 | BE-<br>4256.1.1 | 6552 | 25 | Lombardo et al.<br>2020  |
| Bolivia | Isla FIN15             | -14.358654 | -64.742803 | BE-<br>4257.1.1 | 7997 | 25 | Lombardo et al.<br>2020  |

## Supplementary Material

|         |                          |            |            |             |      |    |                             |
|---------|--------------------------|------------|------------|-------------|------|----|-----------------------------|
| Bolivia | Isla FIN3                | -14.426887 | -64.739    | BE-4250.1.1 | 8572 | 48 | Lombardo et al. 2020        |
| Bolivia | Isla FIN5                | -14.44525  | -64.698786 | BE-4253.1.1 | 6963 | 25 | Lombardo et al. 2020        |
| Bolivia | Isla FIN8                | -14.381387 | -64.711936 | BE-4254.1.1 | 8681 | 22 | Lombardo et al. 2020        |
| Bolivia | Isla Manechi             | -13.767987 | -66.111557 | BE-8256.1.1 | 3017 | 21 | Lombardo et al. 2020        |
| Bolivia | Isla Manechi             | -13.767987 | -66.111557 | BE-8257.1.1 | 4324 | 22 | Lombardo et al. 2020        |
| Bolivia | Isla Manechi             | -13.767987 | -66.111557 | BE-8258.1.1 | 4491 | 23 | Lombardo et al. 2020        |
| Bolivia | Isla Manechi             | -13.767987 | -66.111557 | BE-8259.1.1 | 9138 | 24 | Lombardo et al. 2020        |
| Bolivia | Isla Rodeo, loma pequeña | -15.11     | -65.49     | N/A         | 915  | 25 | Erickson, 2000              |
| Bolivia | Jaco Sa                  | -9.963058  | -67.496941 | Ua-37258    | 1205 | 30 | Schaan et al., 2012         |
| Bolivia | Jaco Sa                  | -9.963058  | -67.496941 | Ua-37257    | 1195 | 30 | Schaan et al., 2012         |
| Bolivia | Jaco Sa                  | -9.963058  | -67.496941 | Ua-37259    | 1485 | 35 | Schaan et al., 2012         |
| Bolivia | Jasiaquiri JAS           | -13.721409 | -63.740455 | KIA-48482   | 610  | 25 | Prümers 2014                |
| Bolivia | Jasiaquiri JAS           | -13.721409 | -63.740455 | KIA-48484   | 500  | 25 | Prümers 2014                |
| Bolivia | Jasiaquiri JAS           | -13.721409 | -63.740455 | KIA-48486   | 444  | 25 | Prümers 2014                |
| Bolivia | Jasiaquiri JAS           | -13.719878 | -63.739923 | KIA-48487   | 596  | 25 | Prümers 2014                |
| Bolivia | JK                       | -9.732034  | -67.061155 | Beta-294309 | 1710 | 30 | Saunaluoma and Schaan, 2012 |
| Bolivia | JK                       | -9.732034  | -67.061155 | Beta-294310 | 1830 | 30 | Saunaluoma and Schaan, 2012 |
| Bolivia | La Chacra SM3            | -14.727075 | -64.67637  | PSUAMS-1450 | 6030 | 30 | Capriles et al. 2019        |
| Bolivia | La Chacra SM3            | -14.727075 | -64.67637  | PSUAMS-1563 | 6650 | 30 | Capriles et al. 2019        |
| Bolivia | La Chacra SM3            | -14.727075 | -64.67637  | PSUAMS-1564 | 7930 | 30 | Capriles et al. 2019        |
| Bolivia | La Chacra SM3            | -14.727075 | -64.67637  | Poz-38865   | 7860 | 50 | Lombardo et al., 2013       |
| Bolivia | La Chacra SM3            | -14.727075 | -64.67637  | Poz-38866   | 7790 | 80 | Lombardo et al., 2013       |

|         |                              |            |            |           |      |     |                              |
|---------|------------------------------|------------|------------|-----------|------|-----|------------------------------|
| Bolivia | La Chacra SM3                | -14.727075 | -64.67637  | Poz-38862 | 5140 | 40  | Lombardo et al., 2013        |
| Bolivia | Laguna Bolivia               | -16.008279 | -65.274054 | Gd-6627   | 1100 | 90  | Ziólkowski et al. 1994:83    |
| Bolivia | Las Palmeras                 | -10.98806  | -66.01028  | Ua-24930  | 1850 | 40  | Saunaluoma, 2010             |
| Bolivia | Las Palmeras                 | -10.98806  | -66.01028  | Ua-24076  | 285  | 35  | Saunaluoma, 2010             |
| Bolivia | Loma Alta de Casarabe        | -14.93     | -64.29     | SI-5371   | 1400 | 75  | Dougherty and Calandra, 1984 |
| Bolivia | Loma Alta de Casarabe        | -14.93     | -64.29     | SI-5375   | 1375 | 60  | Dougherty and Calandra, 1984 |
| Bolivia | Loma Alta de Casarabe        | -14.93     | -64.29     | SI-5372   | 1315 | 70  | Dougherty and Calandra, 1984 |
| Bolivia | Loma Alta de Casarabe        | -14.93     | -64.29     | SI-5384   | 1140 | 90  | Dougherty and Calandra, 1984 |
| Bolivia | Loma Alta de Casarabe        | -14.93     | -64.29     | SI-5382   | 1060 | 65  | Dougherty and Calandra, 1984 |
| Bolivia | Loma Alta de Casarabe        | -14.93     | -64.29     | SI-5870   | 1055 | 55  | Dougherty and Calandra, 1984 |
| Bolivia | Loma Alta de Casarabe        | -14.93     | -64.29     | SI-5380   | 900  | 70  | Dougherty and Calandra, 1984 |
| Bolivia | Loma Alta de Casarabe        | -14.93     | -64.29     | SI-5381   | 835  | 70  | Dougherty and Calandra, 1984 |
| Bolivia | Loma Alta de Casarabe        | -14.93     | -64.29     | SI-5383   | 830  | 70  | Dougherty and Calandra, 1984 |
| Bolivia | Loma Alta de Casarabe        | -14.93     | -64.29     | SI-5385   | 755  | 95  | Dougherty and Calandra, 1984 |
| Bolivia | Loma Alta de Casarabe        | -14.93     | -64.29     | SI-5373   | 680  | 120 | Dougherty and Calandra, 1984 |
| Bolivia | Loma Alta de Casarabe        | -14.93     | -64.29     | SI-5386   | 1465 | 60  | Dougherty and Calandra, 1985 |
| Bolivia | Loma Alta de Casarabe        | -14.93     | -64.29     | SI-5387   | 1615 | 70  | Dougherty and Calandra, 1986 |
| Bolivia | Loma Esperanza II, Río Apere | -14.83     | -65.47     | N/A       | 1030 | 45  | Erickson, 2000               |
| Bolivia | Loma Esperanza II, Río Apere | -14.83     | -65.47     | N/A       | 600  | 25  | Erickson, 2000               |
| Bolivia | Loma Kiusú                   | -14.74     | -65.06     | SI-4442   | 1355 | 60  | Dougherty and Calandra, 1984 |
| Bolivia | Loma Kiusú                   | -14.74     | -65.06     | SI-4438   | 920  | 70  | Dougherty and Calandra, 1984 |
| Bolivia | Loma Kiusú                   | -14.74     | -65.06     | SI-4437   | 895  | 60  | Dougherty and Calandra, 1984 |
| Bolivia | Loma Kiusú                   | -14.74     | -65.06     | SI-4440   | 870  | 70  | Dougherty and Calandra, 1984 |

## Supplementary Material

|         |              |          |          |          |      |    |                                     |
|---------|--------------|----------|----------|----------|------|----|-------------------------------------|
| Bolivia | Loma Kiusú   | -14.74   | -65.06   | SI-4439  | 820  | 60 | Dougherty and Calandra, 1984        |
| Bolivia | Loma Kiusú   | -14.74   | -65.06   | SI-4441  | 1420 | 60 | Dougherty and Calandra, 1985        |
| Bolivia | Loma Kiusú   | -14.74   | -65.06   | SI-4436  | 690  | 65 | Dougherty and Calandra, 1984        |
| Bolivia | Loma Mary    | -14.81   | -65      | SI-4118  | 1360 | 60 | Dougherty and Calandra, 1984        |
| Bolivia | Loma Mary    | -14.81   | -65      | SI-4116  | 970  | 80 | Dougherty and Calandra, 1984        |
| Bolivia | Loma Mary    | -14.81   | -65      | SI-4115  | 940  | 70 | Dougherty and Calandra, 1984        |
| Bolivia | Loma Mary    | -14.81   | -65      | SI-4114  | 640  | 60 | Dougherty and Calandra, 1984        |
| Bolivia | Loma Mary    | -14.81   | -65      | SI-4119  | 1705 | 75 | Dougherty and Calandra, 1985        |
| Bolivia | Loma Mendoza | -14.8817 | -64.4522 | Bln-5328 | 2800 | 29 | Prümers and Jaimes Betancourt, 2014 |
| Bolivia | Loma Mendoza | -14.8817 | -64.4522 | Erl-5610 | 2244 | 54 | Prümers and Jaimes Betancourt, 2014 |
| Bolivia | Loma Mendoza | -14.8817 | -64.4522 | Erl-4789 | 1557 | 39 | Prümers and Jaimes Betancourt, 2014 |
| Bolivia | Loma Mendoza | -14.8817 | -64.4522 | Erl-5613 | 1512 | 54 | Prümers and Jaimes Betancourt, 2014 |
| Bolivia | Loma Mendoza | -14.8817 | -64.4522 | Erl-5604 | 1508 | 51 | Prümers and Jaimes Betancourt, 2014 |
| Bolivia | Loma Mendoza | -14.8817 | -64.4522 | Erl-4785 | 1489 | 54 | Prümers and Jaimes Betancourt, 2014 |
| Bolivia | Loma Mendoza | -14.8817 | -64.4522 | Erl-5606 | 1465 | 53 | Prümers and Jaimes Betancourt, 2014 |
| Bolivia | Loma Mendoza | -14.8817 | -64.4522 | Erl-4787 | 1443 | 38 | Prümers and Jaimes Betancourt, 2014 |
| Bolivia | Loma Mendoza | -14.8817 | -64.4522 | Erl-4790 | 1417 | 36 | Prümers and Jaimes Betancourt, 2014 |
| Bolivia | Loma Mendoza | -14.8817 | -64.4522 | Erl-5609 | 1410 | 53 | Prümers and Jaimes Betancourt, 2014 |

|         |              |          |          |          |      |    |                                     |
|---------|--------------|----------|----------|----------|------|----|-------------------------------------|
| Bolivia | Loma Mendoza | -14.8817 | -64.4522 | Erl-5608 | 1407 | 55 | Prümers and Jaimes Betancourt, 2014 |
| Bolivia | Loma Mendoza | -14.8817 | -64.4522 | Erl-5611 | 1407 | 52 | Prümers and Jaimes Betancourt, 2014 |
| Bolivia | Loma Mendoza | -14.8817 | -64.4522 | Erl-4786 | 1371 | 49 | Prümers and Jaimes Betancourt, 2014 |
| Bolivia | Loma Mendoza | -14.8817 | -64.4522 | Erl-5603 | 1357 | 51 | Prümers and Jaimes Betancourt, 2014 |
| Bolivia | Loma Mendoza | -14.8817 | -64.4522 | Erl-4783 | 1355 | 38 | Prümers and Jaimes Betancourt, 2014 |
| Bolivia | Loma Mendoza | -14.8817 | -64.4522 | Erl-5607 | 1342 | 60 | Prümers and Jaimes Betancourt, 2014 |
| Bolivia | Loma Mendoza | -14.8817 | -64.4522 | Erl-5605 | 1338 | 51 | Prümers and Jaimes Betancourt, 2014 |
| Bolivia | Loma Mendoza | -14.8817 | -64.4522 | Erl-5616 | 1316 | 57 | Prümers and Jaimes Betancourt, 2014 |
| Bolivia | Loma Mendoza | -14.8817 | -64.4522 | Erl-5612 | 1313 | 52 | Prümers and Jaimes Betancourt, 2014 |
| Bolivia | Loma Mendoza | -14.8817 | -64.4522 | Erl-4788 | 1296 | 36 | Prümers and Jaimes Betancourt, 2014 |
| Bolivia | Loma Mendoza | -14.8817 | -64.4522 | Erl-4792 | 1275 | 37 | Prümers and Jaimes Betancourt, 2014 |
| Bolivia | Loma Mendoza | -14.8817 | -64.4522 | Erl-3204 | 1261 | 37 | Prümers and Jaimes Betancourt, 2014 |
| Bolivia | Loma Mendoza | -14.8817 | -64.4522 | Erl-3207 | 1254 | 40 | Prümers and Jaimes Betancourt, 2014 |
| Bolivia | Loma Mendoza | -14.8817 | -64.4522 | Erl-3205 | 1253 | 36 | Prümers and Jaimes Betancourt, 2014 |
| Bolivia | Loma Mendoza | -14.8817 | -64.4522 | Erl-5615 | 1238 | 53 | Prümers and Jaimes Betancourt, 2014 |
| Bolivia | Loma Mendoza | -14.8817 | -64.4522 | Erl-5614 | 1235 | 53 | Prümers and Jaimes Betancourt, 2014 |

## Supplementary Material

|         |              |          |          |           |      |    |                                     |
|---------|--------------|----------|----------|-----------|------|----|-------------------------------------|
| Bolivia | Loma Mendoza | -14.8817 | -64.4522 | Erl-3206  | 1231 | 38 | Prümers and Jaimes Betancourt, 2014 |
| Bolivia | Loma Mendoza | -14.8817 | -64.4522 | Erl-3202  | 1186 | 66 | Prümers and Jaimes Betancourt, 2014 |
| Bolivia | Loma Mendoza | -14.8817 | -64.4522 | BlN-5327  | 1134 | 33 | Prümers and Jaimes Betancourt, 2014 |
| Bolivia | Loma Mendoza | -14.8817 | -64.4522 | BlN-5325  | 1077 | 28 | Prümers and Jaimes Betancourt, 2014 |
| Bolivia | Loma Mendoza | -14.8817 | -64.4522 | BlN-5214  | 1065 | 29 | Prümers and Jaimes Betancourt, 2014 |
| Bolivia | Loma Mendoza | -14.8817 | -64.4522 | BlN-5212  | 1050 | 31 | Prümers and Jaimes Betancourt, 2014 |
| Bolivia | Loma Mendoza | -14.8817 | -64.4522 | Erl-3201  | 1043 | 43 | Prümers and Jaimes Betancourt, 2014 |
| Bolivia | Loma Mendoza | -14.8817 | -64.4522 | BlN-5344  | 1036 | 39 | Prümers and Jaimes Betancourt, 2014 |
| Bolivia | Loma Mendoza | -14.8817 | -64.4522 | BlN-5211  | 1030 | 28 | Prümers and Jaimes Betancourt, 2014 |
| Bolivia | Loma Mendoza | -14.8817 | -64.4522 | Erl-3208  | 1026 | 43 | Prümers and Jaimes Betancourt, 2014 |
| Bolivia | Loma Mendoza | -14.8817 | -64.4522 | Erl-3200  | 973  | 45 | Prümers and Jaimes Betancourt, 2014 |
| Bolivia | Loma Mendoza | -14.8817 | -64.4522 | BlN-5345  | 961  | 24 | Prümers and Jaimes Betancourt, 2014 |
| Bolivia | Loma Mendoza | -14.8817 | -64.4522 | Erl-3203  | 953  | 38 | Prümers and Jaimes Betancourt, 2014 |
| Bolivia | Loma Mendoza | -14.8817 | -64.4522 | BlN-5326  | 950  | 29 | Prümers and Jaimes Betancourt, 2014 |
| Bolivia | Loma Mendoza | -14.8817 | -64.4522 | BlN-5213  | 948  | 29 | Prümers and Jaimes Betancourt, 2014 |
| Bolivia | Loma Mendoza | -14.8817 | -64.4522 | KIA-40609 | 661  | 21 | Prümers 2015                        |

|         |                  |          |          |            |      |    |                                        |
|---------|------------------|----------|----------|------------|------|----|----------------------------------------|
| Bolivia | Loma Mendoza     | -14.8817 | -64.4522 | Erl-4791   | 651  | 34 | Prümers and Jaimes<br>Betancourt, 2014 |
| Bolivia | Loma Mendoza     | -14.8817 | -64.4522 | Bln-5210   | 631  | 29 | Prümers and Jaimes<br>Betancourt, 2014 |
| Bolivia | Loma Mendoza     | -14.8817 | -64.4522 | Erl-3199   | 609  | 46 | Prümers and Jaimes<br>Betancourt, 2014 |
| Bolivia | Loma Mendoza     | -14.8817 | -64.4522 | Erl-4784   | 335  | 48 | Prümers and Jaimes<br>Betancourt, 2014 |
| Bolivia | Loma Palmazola   | -15.04   | -64.8    | SI-4048    | 740  | 60 | Dougherty and Calandra, 1984           |
| Bolivia | Loma Palmazola   | -15.04   | -64.8    | SI-4113    | 675  | 70 | Dougherty and Calandra, 1984           |
| Bolivia | Loma Salvatierra | -14.8844 | -64.4875 | Bln-5946LI | 3319 | 42 | Prümers and Jaimes<br>Betancourt, 2014 |
| Bolivia | Loma Salvatierra | -14.8844 | -64.4875 | Erl-8011   | 2594 | 49 | Prümers and Jaimes<br>Betancourt, 2014 |
| Bolivia | Loma Salvatierra | -14.8844 | -64.4875 | KIA-31856  | 1623 | 30 | Prümers and Jaimes<br>Betancourt, 2014 |
| Bolivia | Loma Salvatierra | -14.8844 | -64.4875 | KIA-32720  | 1489 | 27 | Prümers and Jaimes<br>Betancourt, 2014 |
| Bolivia | Loma Salvatierra | -14.8844 | -64.4875 | Bln-5945-L | 1389 | 30 | Prümers and Jaimes<br>Betancourt, 2014 |
| Bolivia | Loma Salvatierra | -14.8844 | -64.4875 | SI-5391    | 1380 | 65 | Dougherty and Calandra, 1984           |
| Bolivia | Loma Salvatierra | -14.8844 | -64.4875 | KIA-31854  | 1350 | 20 | Prümers and Jaimes<br>Betancourt, 2014 |
| Bolivia | Loma Salvatierra | -14.8844 | -64.4875 | KIA-31855  | 1341 | 24 | Prümers and Jaimes<br>Betancourt, 2014 |
| Bolivia | Loma Salvatierra | -14.8844 | -64.4875 | Bln-5860   | 1337 | 39 | Prümers and Jaimes<br>Betancourt, 2014 |
| Bolivia | Loma Salvatierra | -14.8844 | -64.4875 | KIA-38804  | 1335 | 26 | Prümers and Jaimes<br>Betancourt, 2014 |
| Bolivia | Loma Salvatierra | -14.8844 | -64.4875 | SI-5393    | 1325 | 50 | Dougherty and Calandra, 1984           |

## Supplementary Material

|         |                  |          |          |                |      |    |                                           |
|---------|------------------|----------|----------|----------------|------|----|-------------------------------------------|
| Bolivia | Loma Salvatierra | -14.8844 | -64.4875 | KIA-38803      | 1316 | 27 | Jaimes<br>Betancourt, 2010                |
| Bolivia | Loma Salvatierra | -14.8844 | -64.4875 | BlN-5861       | 1311 | 26 | Prümers and<br>Jaimes<br>Betancourt, 2014 |
| Bolivia | Loma Salvatierra | -14.8844 | -64.4875 | KIA-38805      | 1300 | 23 | Jaimes<br>Betancourt, 2010                |
| Bolivia | Loma Salvatierra | -14.8844 | -64.4875 | Erl-8016       | 1278 | 53 | Prümers and<br>Jaimes<br>Betancourt, 2014 |
| Bolivia | Loma Salvatierra | -14.8844 | -64.4875 | BlN-5947<br>LI | 1275 | 39 | Prümers and<br>Jaimes<br>Betancourt, 2014 |
| Bolivia | Loma Salvatierra | -14.8844 | -64.4875 | Erl-8014       | 1275 | 46 | Prümers and<br>Jaimes<br>Betancourt, 2014 |
| Bolivia | Loma Salvatierra | -14.8844 | -64.4875 | KIA-38802      | 1240 | 28 | Prümers and<br>Jaimes<br>Betancourt, 2014 |
| Bolivia | Loma Salvatierra | -14.8844 | -64.4875 | KIA-32718      | 1239 | 31 | Prümers and<br>Jaimes<br>Betancourt, 2014 |
| Bolivia | Loma Salvatierra | -14.8844 | -64.4875 | KIA-38813      | 1228 | 23 | Jaimes<br>Betancourt, 2010                |
| Bolivia | Loma Salvatierra | -14.8844 | -64.4875 | KIA-38808      | 1224 | 24 | Jaimes<br>Betancourt, 2010                |
| Bolivia | Loma Salvatierra | -14.8844 | -64.4875 | KIA-38812      | 1223 | 26 | Jaimes<br>Betancourt, 2010                |
| Bolivia | Loma Salvatierra | -14.8844 | -64.4875 | KIA-32719      | 1201 | 24 | Prümers and<br>Jaimes<br>Betancourt, 2014 |
| Bolivia | Loma Salvatierra | -14.8844 | -64.4875 | KIA-31858      | 1156 | 25 | Prümers and<br>Jaimes<br>Betancourt, 2014 |
| Bolivia | Loma Salvatierra | -14.8844 | -64.4875 | SI-5394        | 1105 | 80 | Dougherty and<br>Calandra, 1984           |
| Bolivia | Loma Salvatierra | -14.8844 | -64.4875 | KIA-38800      | 1060 | 25 | Prümers and<br>Jaimes<br>Betancourt, 2014 |
| Bolivia | Loma Salvatierra | -14.8844 | -64.4875 | Erl-8012       | 1044 | 44 | Prümers and<br>Jaimes<br>Betancourt, 2014 |
| Bolivia | Loma Salvatierra | -14.8844 | -64.4875 | KIA-31859      | 1041 | 20 | Prümers and<br>Jaimes<br>Betancourt, 2014 |
| Bolivia | Loma Salvatierra | -14.8844 | -64.4875 | SI-5878        | 1040 | 45 | Dougherty and<br>Calandra, 1984           |



|         |                  |            |            |           |      |     |                                     |
|---------|------------------|------------|------------|-----------|------|-----|-------------------------------------|
| Bolivia | Loma Salvatierra | -14.8844   | -64.4875   | SI-5390   | 1035 | 95  | Dougherty and Calandra, 1984        |
| Bolivia | Loma Salvatierra | -14.8844   | -64.4875   | Erl-8013  | 1030 | 44  | Prümers and Jaimes Betancourt, 2014 |
| Bolivia | Loma Salvatierra | -14.8844   | -64.4875   | KIA-38810 | 1007 | 22  | Jaimes Betancourt, 2010             |
| Bolivia | Loma Salvatierra | -14.8844   | -64.4875   | SI-5879   | 1005 | 50  | Dougherty and Calandra, 1984        |
| Bolivia | Loma Salvatierra | -14.8844   | -64.4875   | Erl-8015  | 985  | 45  | Prümers and Jaimes Betancourt, 2014 |
| Bolivia | Loma Salvatierra | -14.8844   | -64.4875   | KIA-38801 | 957  | 23  | Prümers and Jaimes Betancourt, 2014 |
| Bolivia | Loma Salvatierra | -14.8844   | -64.4875   | KIA-31857 | 956  | 25  | Prümers and Jaimes Betancourt, 2014 |
| Bolivia | Loma Salvatierra | -14.8844   | -64.4875   | KIA-32717 | 948  | 25  | Prümers and Jaimes Betancourt, 2014 |
| Bolivia | Loma Salvatierra | -14.8844   | -64.4875   | KIA-38807 | 947  | 21  | Jaimes Betancourt, 2010             |
| Bolivia | Loma Salvatierra | -14.8844   | -64.4875   | KIA-38809 | 932  | 22  | Jaimes Betancourt, 2010             |
| Bolivia | Loma Salvatierra | -14.8844   | -64.4875   | KIA-38814 | 896  | 32  | Jaimes Betancourt, 2010             |
| Bolivia | Loma Salvatierra | -14.8844   | -64.4875   | SI-5392   | 820  | 70  | Dougherty and Calandra, 1984        |
| Bolivia | Loma Salvatierra | -14.8844   | -64.4875   | KIA-38811 | 740  | 23  | Jaimes Betancourt, 2010             |
| Bolivia | Loma Salvatierra | -14.8844   | -64.4875   | KIA-38806 | 596  | 22  | Jaimes Betancourt, 2010             |
| Bolivia | Monte Castelo    | -12.553392 | -63.096672 | B103187   | 8350 | 70  | Miller, 2009                        |
| Bolivia | Monte Castelo    | -12.553392 | -63.096672 | B118274   | 7010 | 80  | Miller, 2009                        |
| Bolivia | Monte Castelo    | -12.553392 | -63.096672 | SI6850    | 6316 | 105 | Miller, 2009                        |
| Bolivia | Monte Castelo    | -12.553392 | -63.096672 | B118275   | 5970 | 80  | Miller, 2009                        |
| Bolivia | Monte Castelo    | -12.553392 | -63.096672 | SI6853    | 5605 | 95  | Miller, 2009                        |
| Bolivia | Monte Castelo    | -12.553392 | -63.096672 | SI6854    | 5165 | 80  | Miller, 2009                        |
| Bolivia | Monte Castelo    | -12.553392 | -63.096672 | SI6849    | 5065 | 85  | Miller, 2009                        |
| Bolivia | Monte Castelo    | -12.553392 | -63.096672 | B66310    | 4810 | 90  | Miller, 2009                        |
| Bolivia | Monte Castelo    | -12.553392 | -63.096672 | SI6852    | 4455 | 100 | Miller, 2009                        |
| Bolivia | Monte Castelo    | -12.553392 | -63.096672 | SI6848    | 4395 | 70  | Miller, 2009                        |
| Bolivia | Monte Castelo    | -12.553392 | -63.096672 | SI6845    | 3945 | 110 | Miller, 2009                        |

## Supplementary Material

|         |                            |            |            |             |      |     |                                     |
|---------|----------------------------|------------|------------|-------------|------|-----|-------------------------------------|
| Bolivia | Monte Castelo              | -12.553392 | -63.096672 | SI6847      | 3920 | 85  | Miller, 2009                        |
| Bolivia | Monte Castelo              | -12.553392 | -63.096672 | B66309      | 3160 | 70  | Miller, 2009                        |
| Bolivia | Monte Castelo              | -12.553392 | -63.096672 | SI6843      | 2475 | 105 | Miller, 2009                        |
| Bolivia | Monte Castelo              | -12.553392 | -63.096672 | SI6844      | 2270 | 105 | Miller, 2009                        |
| Bolivia | Monte Castelo              | -12.553392 | -63.096672 | B103185     | 810  | 70  | Miller, 2009                        |
| Bolivia | Moxos - Baures             | -13.65     | -63.69     | OS-17293    | 335  | 20  | Erickson, 2000                      |
| Bolivia | Ramal do Capatara          | -10.365627 | -67.719037 | Beta-288232 | 1850 | 40  | Saunaluoma and Schaan, 2012         |
| Bolivia | Ramal do Capatara          | -10.365627 | -67.719037 | Beta-288233 | 1990 | 30  | Saunaluoma and Schaan, 2012         |
| Bolivia | Ramal do Capatara          | -10.365627 | -67.719037 | Beta-288234 | 3310 | 40  | Saunaluoma and Schaan, 2012         |
| Bolivia | Río Iruyañez               | -13.47     | -65.73     | AA30390     | 620  | 40  | Walker, 2000                        |
| Bolivia | Río Iruyañez               | -13.47     | -65.73     | AA30391     | 620  | 40  | Walker, 2000                        |
| Bolivia | Río Iruyañez               | -13.47     | -65.73     | Beta-117220 | 610  | 70  | Walker, 2000                        |
| Bolivia | Río Iruyañez               | -13.47     | -65.73     | AA30392     | 600  | 45  | Walker, 2000                        |
| Bolivia | Río Iruyañez               | -13.47     | -65.73     | AA30389     | 570  | 45  | Walker, 2000                        |
| Bolivia | Río Iruyañez               | -13.47     | -65.73     | Beta-117221 | 470  | 90  | Walker, 2000                        |
| Bolivia | San Borja, Estancia Suárez | -14.9      | -66.74     | N/A         | 2830 | 260 | Prümers and Jaimes Betancourt, 2014 |
| Bolivia | San Borja, Estancia Suárez | -14.9      | -66.74     | N/A         | 980  | 170 | Prümers and Jaimes Betancourt, 2014 |
| Bolivia | San Borja, Estancia Suárez | -14.9      | -66.74     | N/A         | 600  | 60  | Prümers and Jaimes Betancourt, 2014 |
| Bolivia | San Francisco SM2          | -15.166254 | -65.042352 | Poz-38852   | 5500 | 40  | Lombardo et al., 2013               |
| Bolivia | San Francisco SM2          | -15.166254 | -65.042352 | Poz-38851   | 5380 | 40  | Lombardo et al., 2013               |
| Bolivia | San Francisco SM2          | -15.166254 | -65.042352 | Poz-38853   | 4950 | 40  | Lombardo et al., 2013               |
| Bolivia | San Francisco SM2          | -15.166254 | -65.042352 | Poz-38850   | 4770 | 60  | Lombardo et al., 2013               |
| Bolivia | San Juan                   | -13.23447  | -65.4123   | AA30390     | 620  | 40  | Walker, 2004                        |
| Bolivia | San Juan                   | -13.23447  | -65.4123   | AA30391     | 620  | 40  | Walker, 2004                        |
| Bolivia | San Juan                   | -13.23447  | -65.4123   | AA30392     | 600  | 45  | Walker, 2004                        |
| Bolivia | San Juan                   | -13.23447  | -65.4123   | AA30389     | 570  | 45  | Walker, 2004                        |
| Bolivia | San Juan                   | -13.23447  | -65.4123   | AA30388     | 535  | 45  | Walker, 2004                        |

|         |                   |            |            |             |      |    |                      |
|---------|-------------------|------------|------------|-------------|------|----|----------------------|
| Bolivia | San Juan          | -13.32619  | -65.4868   | AA30387     | 5825 | 70 | Walker, 2004         |
| Bolivia | San Juan          | -13.32619  | -65.4868   | 117222      | 5740 | 40 | Walker, 2004         |
| Bolivia | San Juan          | -13.32619  | -65.4868   | AA30385     | 1560 | 45 | Walker, 2004         |
| Bolivia | San Juan          | -13.32619  | -65.4868   | 117223      | 1560 | 50 | Walker, 2004         |
| Bolivia | San Juan          | -13.32619  | -65.4868   | AA30386     | 1550 | 45 | Walker, 2004         |
| Bolivia | San Juan          | -13.32619  | -65.4868   | AA30384     | 1530 | 45 | Walker, 2004         |
| Bolivia | San Juan          | -13.32619  | -65.4868   | AA3083      | 1475 | 55 | Walker, 2004         |
| Bolivia | San Pablo SM4     | -14.419898 | -64.75695  | D-AMS-1737  | 5476 | 35 | Capriles et al. 2019 |
| Bolivia | San Pablo SM4     | -14.419898 | -64.75695  | D-AMS-1739  | 6910 | 30 | Capriles et al. 2019 |
| Bolivia | San Pablo SM4     | -14.419898 | -64.75695  | D-AMS-1748A | 6621 | 51 | Lombardo et al. 2020 |
| Bolivia | San Pablo SM4     | -14.419898 | -64.75695  | D-AMS-1741  | 5490 | 32 | Capriles et al. 2019 |
| Bolivia | San Pablo SM4     | -14.419898 | -64.75695  | PSUAMS-4659 | 6665 | 25 | Capriles et al. 2019 |
| Bolivia | San Pablo SM4     | -14.419898 | -64.75695  | Poz-46396   | 7700 | 90 | Capriles et al. 2019 |
| Bolivia | San Pablo SM4     | -14.419898 | -64.75695  | Poz-46397   | 5190 | 80 | Capriles et al. 2019 |
| Bolivia | San Pablo SM4     | -14.419898 | -64.75695  | D-AMS-1748B | 3213 | 32 | Lombardo et al. 2020 |
| Bolivia | Severino Calazans | -10.025002 | -67.506946 | Ua-37237    | 3990 | 40 | Schaan et al., 2012  |
| Bolivia | Severino Calazans | -10.025002 | -67.506946 | Ua-37238    | 2915 | 35 | Schaan et al., 2012  |
| Bolivia | Severino Calazans | -10.025002 | -67.506946 | Ua-37265    | 2275 | 35 | Schaan et al., 2012  |
| Bolivia | Severino Calazans | -10.025002 | -67.506946 | Ua-37264    | 2050 | 35 | Schaan et al., 2012  |
| Bolivia | Sol de Campinas   | -10.057675 | -67.308906 | Beta-408412 | 440  | 30 | Neves et al., 2016   |
| Bolivia | Sol de Campinas   | -10.057675 | -67.308906 | Beta-408410 | 530  | 30 | Neves et al., 2016   |
| Bolivia | Sol de Campinas   | -10.057675 | -67.308906 | Beta-408409 | 660  | 30 | Neves et al., 2016   |
| Bolivia | Sol de Campinas   | -10.057675 | -67.308906 | Beta-408407 | 730  | 30 | Neves et al., 2016   |
| Bolivia | Sol de Campinas   | -10.057675 | -67.308906 | Beta-408408 | 960  | 30 | Neves et al., 2016   |
| Bolivia | Versalles         | -12.656287 | -63.385386 | Beta-488182 | 2380 | 30 | Robinson et al. 2020 |

## Supplementary Material

|         |            |            |            |               |      |    |                      |
|---------|------------|------------|------------|---------------|------|----|----------------------|
| Bolivia | Triunfo    | -12.71356  | -63.450942 | Beta-488184   | 660  | 30 | Robinson et al. 2020 |
| Bolivia | Triunfo    | -12.71356  | -63.450942 | Beta-488183   | 260  | 30 | Robinson et al. 2020 |
| Bolivia | Triunfo    | -12.71356  | -63.450942 | Beta-488185   | 400  | 30 | Robinson et al. 2020 |
| Bolivia | Triunfo    | -12.71356  | -63.450942 | Beta-488190   | 2270 | 30 | Robinson et al. 2020 |
| Bolivia | Triunfo    | -12.71356  | -63.450942 | Beta-494922   | 2120 | 30 | Robinson et al. 2020 |
| Bolivia | Triunfo    | -12.71356  | -63.450942 | Beta-494921   | 3220 | 30 | Robinson et al. 2020 |
| Bolivia | Triunfo    | -12.71356  | -63.450942 | Beta-494920   | 1820 | 30 | Robinson et al. 2020 |
| Bolivia | Triunfo    | -12.71356  | -63.450942 | Beta-494919   | 1280 | 30 | Robinson et al. 2020 |
| Bolivia | Triunfo    | -12.71356  | -63.450942 | Beta-500929   | 140  | 30 | Robinson et al. 2020 |
| Bolivia | Tumichucua | -11.13333  | -66.15     | Ua-24932      | 2045 | 65 | Saunaluoma, 2010     |
| Bolivia | Tumichucua | -11.13333  | -66.15     | Hela-702      | 1905 | 40 | Saunaluoma, 2010     |
| Bolivia | Waioco     | -14.41     | -60.09     | SI-3744       | 1945 | 55 | Miller, 1977         |
| Bolivia | Core 442   | -14.758391 | -67.171333 | D-AMS-6325    | 7355 | 30 | Lombardo et al. 2018 |
| Bolivia | Core 518   | -14.756264 | -67.07703  | LARA-6154.1.1 | 1560 | 19 | Lombardo et al. 2018 |
| Bolivia | Core 414   | -14.878853 | -66.720706 | LARA-         | 2836 | 42 | Lombardo et al. 2018 |
| Bolivia | Core 414   | -14.878853 | -66.720706 | LARA-         | 2408 | 26 | Lombardo et al. 2018 |
| Bolivia | Core SB_29 | -14.82639  | -66.714925 | D-AMS-6330A   | 7034 | 31 | Lombardo et al. 2018 |
| Bolivia | Core SB_29 | -14.82639  | -66.714925 | D-AMS-6330B   | 2790 | 28 | Lombardo et al. 2018 |
| Bolivia | Core 296   | -14.82541  | -66.712751 | D-AMS-6318    | 6163 | 41 | Lombardo et al. 2018 |
| Bolivia | Core 481   | -14.842767 | -66.68954  | LARA-         | 798  | 25 | Lombardo et al. 2018 |
| Bolivia | Core 481   | -14.842767 | -66.68954  | LARA-         | 707  | 24 | Lombardo et al. 2018 |
| Bolivia | Core 481   | -14.842767 | -66.68954  | LARA-         | 5024 | 50 | Lombardo et al. 2018 |
| Bolivia | Core 415   | -14.931763 | -66.439693 | D_AMS-6322A   | 6386 | 34 | Lombardo et al. 2018 |

|         |          |            |            |               |       |     |                         |
|---------|----------|------------|------------|---------------|-------|-----|-------------------------|
| Bolivia | Core 415 | -14.931763 | -66.439693 | D_AMS-6322B   | 2954  | 27  | Lombardo et al. 2018    |
| Bolivia | Core 415 | -14.931763 | -66.439693 | LARA-1785.1.1 | 3183  | 20  | Lombardo et al. 2018    |
| Bolivia | Core 447 | -14.860401 | -66.345536 | LARA-3254.1.1 | 8125  | 67  | Lombardo et al. 2018    |
| Bolivia | Core 447 | -14.860401 | -66.345536 | D-AMS-6323A   | 14967 | 51  | Lombardo et al. 2018    |
| Bolivia | Core 447 | -14.860401 | -66.345536 | D-AMS-6323B   | 5430  | 39  | Lombardo et al. 2018    |
| Bolivia | Core 447 | -14.860401 | -66.345536 | LARA-         | 2846  | 27  | Lombardo et al. 2018    |
| Bolivia | Core 447 | -14.860401 | -66.345536 | D-AMS-6324    | 4348  | 32  | Lombardo et al. 2018    |
| Bolivia | Core 416 | -14.831522 | -66.119951 | D-AMS-6320A   | 7178  | 35  | Lombardo et al. 2018    |
| Bolivia | Core 416 | -14.831522 | -66.119951 | D-AMS-6320B   | 2430  | 27  | Lombardo et al. 2018    |
| Bolivia | Core 416 | -14.831522 | -66.119951 | LARA-1783.1.1 | 2830  | 19  | Lombardo et al. 2018    |
| Bolivia | Core 416 | -14.831522 | -66.119951 | D-AMS-6321    | 3010  | 27  | Lombardo et al. 2018    |
| Bolivia | Core 416 | -14.831522 | -66.119951 | LARA-1784.1.1 | 3490  | 21  | Lombardo et al. 2018:34 |
| Bolivia | Core 441 | -15.008849 | -65.71791  | LARA-6238.1.1 | 6340  | 55  | Lombardo et al. 2018    |
| Bolivia | Core 441 | -15.008849 | -65.71791  | LARA-6239.1.1 | 4327  | 45  | Lombardo et al. 2018    |
| Bolivia | Core 441 | -15.008849 | -65.71791  | LARA-6240.1.1 | 8548  | 110 | Lombardo et al. 2018    |
| Bolivia | Core 417 | -15.000101 | -65.604185 | LARA-6237.1.1 | 2722  | 34  | Lombardo et al. 2018    |
| Bolivia | Core 418 | -14.947707 | -65.45867  | LARA-1780.1.1 | 2989  | 22  | Lombardo et al. 2018    |
| Bolivia | Core 418 | -14.947707 | -65.45867  | LARA-         | 2681  | 26  | Lombardo et al. 2018    |
| Bolivia | Core 418 | -14.947707 | -65.45867  | D-AMS-6319    | 3216  | 33  | Lombardo et al. 2018    |
| Bolivia | Core 418 | -14.947707 | -65.45867  | LARA-1782.1.1 | 3663  | 20  | Lombardo et al. 2018    |
| Bolivia | Core 440 | -14.892468 | -65.379499 | Poz-39569     | 6480  | 60  | Lombardo et al. 2018    |
| Bolivia | Core 440 | -14.892468 | -65.379499 | Poz-39604     | 4520  | 40  | Lombardo 2014           |
| Bolivia | Core 40  | -14.905046 | -65.329139 | Poz-34300     | 2900  | 35  | Lombardo 2014           |

## Supplementary Material

|         |             |            |            |               |      |    |                       |
|---------|-------------|------------|------------|---------------|------|----|-----------------------|
| Bolivia | Core 480    | -14.851667 | -65.102172 | LARA-6241.1.1 | 9356 | 80 | Lombardo et al. 2018  |
| Bolivia | Core 480    | -14.851667 | -65.102172 | LARA-6242.1.1 | 7719 | 45 | Lombardo et al. 2018  |
| Bolivia | Core 480    | -14.851667 | -65.102172 | LARA-6243.1.1 | 9158 | 63 | Lombardo et al. 2018  |
| Bolivia | Core 499    | -14.875451 | -65.04486  | LARA-         | 3453 | 30 | Lombardo et al. 2018  |
| Bolivia | Core 499    | -14.875451 | -65.04486  | LARA-         | 3491 | 29 | Lombardo et al. 2018  |
| Bolivia | Core 499    | -14.875451 | -65.04486  | LARA-         | 8203 | 49 | Lombardo et al. 2018  |
| Bolivia | Core 52     | -14.962122 | -64.639981 | Poz-34303     | 6200 | 40 | Lombardo et al. 2012  |
| Bolivia | Core 170    | -14.930284 | -64.480333 | Poz-38855     | 5610 | 50 | Lombardo et al. 2012  |
| Bolivia | Core B1-247 | -14.816095 | -64.472081 | D-AMS-2335A   | 9568 | 48 | Lombardo et al. 2018  |
| Bolivia | Core B1-247 | -14.816095 | -64.472081 | D-AMS-2335B   | 5618 | 40 | Lombardo et al. 2018  |
| Bolivia | Core 205    | -14.935759 | -64.398788 | Poz-38867     | 5070 | 40 | Lombardo et al. 2012  |
| Bolivia | Core 205    | -14.935759 | -64.398788 | Poz-38868     | 5840 | 40 | Lombardo et al. 2012  |
| Bolivia | Core 203    | -14.690237 | -64.353773 | Poz-39599     | 2035 | 40 | Lombardo et al. 2018  |
| Bolivia | Core 203    | -14.690237 | -64.353773 | Poz-39634     | 2245 | 40 | Lombardo et al. 2018  |
| Bolivia | Core 35     | -15.123976 | -64.326647 | Poz-22767     | 4545 | 40 | Lombardo et al. 2012  |
| Bolivia | Core 35     | -15.123976 | -64.326647 | Poz-22766     | 4305 | 40 | Lombardo et al. 2012  |
| Bolivia | Mox 51/9    | -14.913278 | -65.587944 | Poz-71922     | 6830 | 50 | Boixadera et al. 2019 |

## 1.1 Supplementary Figures

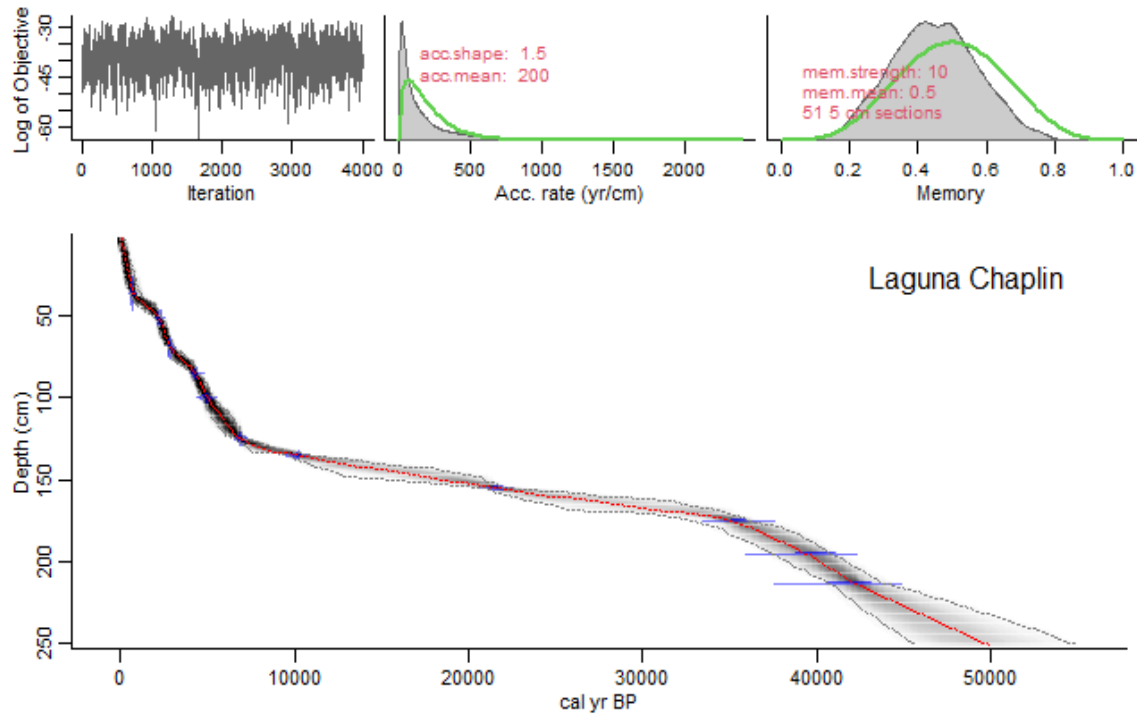

**Figure S1.** Bacon Age-Depth Model for Laguna Chapin: Age-Depth model with MCMC iterations (top left) and priors (green curves) and posteriors (grey histograms) for accumulation rate (top middle) and memory (top right). The age model iterations (black hatching) are based on radiocarbon ages (blue pdfs) with model mean (red dashed) and 2s (black dashed) distributions. Dates were calibrated using the IntCal20 calibration curve.

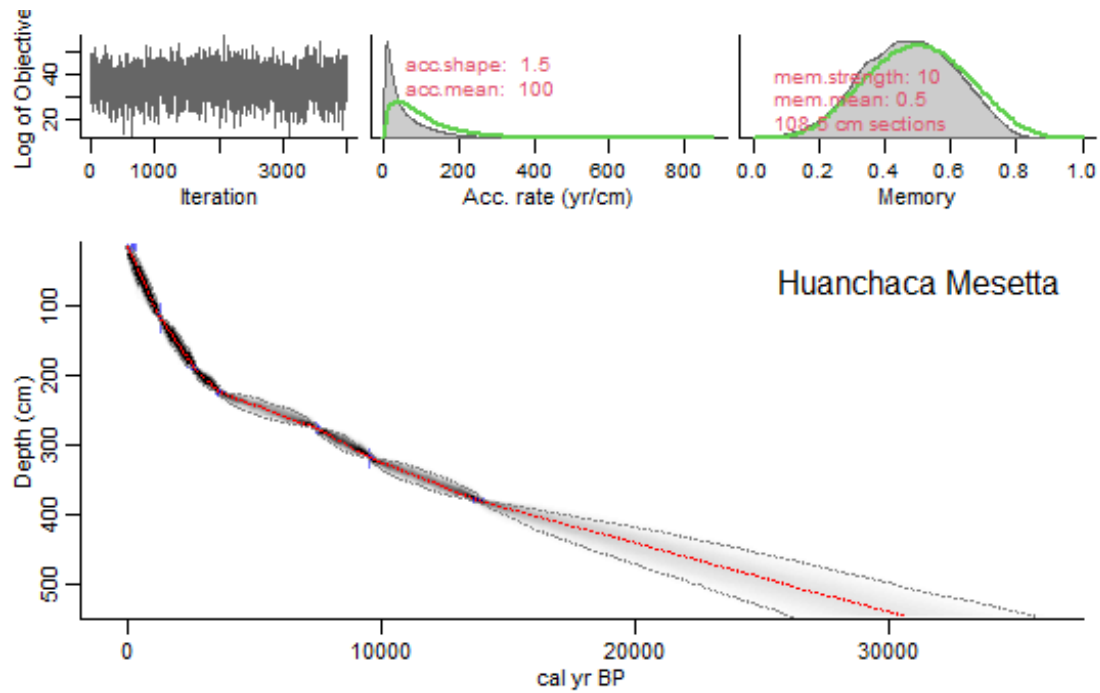

**Figure S2.** Age-Depth Model for Huanchaca Mesetta: Age-Depth model with MCMC iterations (top left) and priors (green curves) and posteriors (grey histograms) for accumulation rate (top middle) and memory (top right). The age model iterations (black hatching) are based on radiocarbon ages (blue pdfs) with model mean (red dashed) and 2s (black dashed) distributions. Dates were calibrated using the IntCal20 calibration curve.



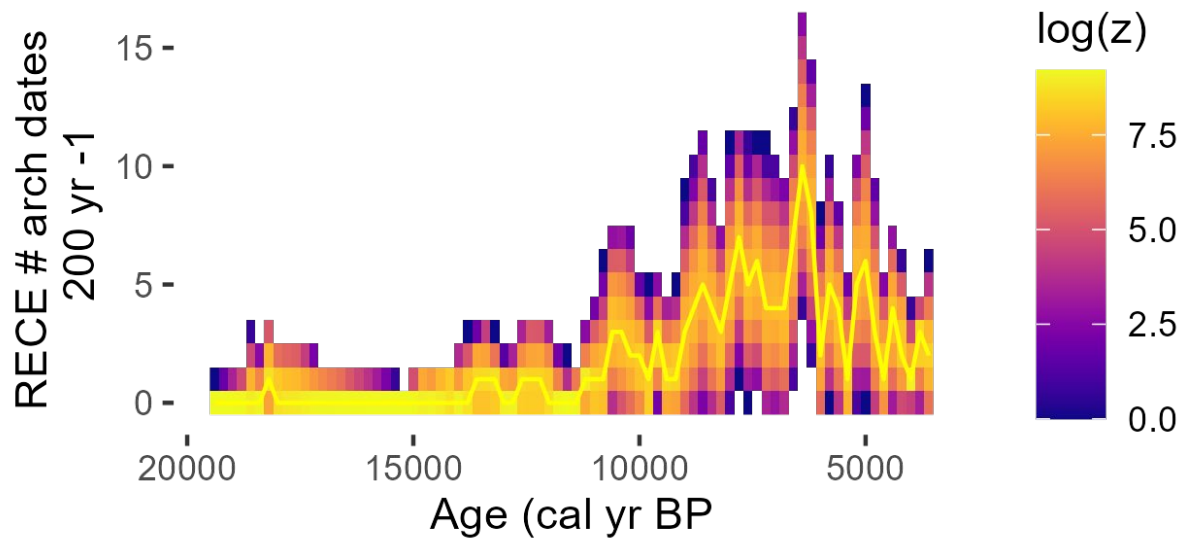

**Figure S3.** Regional RECE Model 19,500 cal yr BP to 3500 cal yr BP. Yellow line represents running mean.

## References

- Boixadera, J., Esteban, I., Albert, R. M., and Poch, R. M. (2019). Anthropogenic soils from Llanos de Moxos (Bolivia): Soils from pre-Columbian raised fields. *Catena* 172, 21–39.
- Capriles, J. M., Lombardo, U., Maley, B., Zuna, C., Veit, H., and Kennett, D. J. (2019). Persistent Early to Middle Holocene tropical foraging in southwestern Amazonia. *Science Advances* 5, eaav5449. doi: 10.1126/sciadv.aav5449.
- Dougherty, B., Calandra, H. A., and Rabassa, J. (1984). *Quaternary of South America and Antarctic Peninsula*. AA Balkema Rotterdam.
- Erickson, C. L. (2000). The Bolivian Amazon. 408.
- Jaimes Betancourt, C. (2010). La cerámica de la Loma Salvatierra.
- Lombardo, U. (2014). Neotectonics, flooding patterns and landscape evolution in southern Amazonia. *Earth Surface Dynamics* 2, 493–511. doi: 10.5194/esurf-2-493-2014.
- Lombardo, U., Iriarte, J., Hilbert, L., Ruiz-Pérez, J., Capriles, J. M., and Veit, H. (2020). Early Holocene crop cultivation and landscape modification in Amazonia. *Nature* 581, 190–193. doi: 10.1038/s41586-020-2162-7.
- Lombardo, U., May, J.-H., and Veit, H. (2012). Mid- to late-Holocene fluvial activity behind pre-Columbian social complexity in the southwestern Amazon basin. *The Holocene* 22, 1035–1045. doi: 10.1177/0959683612437872.
- Lombardo, U., Rodrigues, L., and Veit, H. (2018). Alluvial plain dynamics and human occupation in SW Amazonia during the Holocene: A paleosol-based reconstruction. *Quaternary Science Reviews* 180, 30–41. doi: <https://doi.org/10.1016/j.quascirev.2017.11.026>.
- Lombardo, U., Szabo, K., Capriles, J. M., May, J.-H., Amelung, W., Hutterer, R., et al. (2013). Early and Middle Holocene Hunter-Gatherer Occupations in Western Amazonia: The Hidden Shell Middens. *PLOS ONE* 8, e72746.
- Miller, E. (1987). Pesquisas Arqueológicas Paleoindígenas No Brasil Ocidental. *Estudios Atacameños* 8, 37–61.
- Miller, E. T. (2009). A Cultura Cerâmica do Tronco Tupí no alto Ji-Paraná, Rondônia, Brasil: Algumas Reflexões Teóricas, Hipotéticas e Conclusivas. *Revista Brasileira de Linguística Antropológica* 1, 35–136.
- Neves, E., Pugliese, F., Shock, M., Furquim, L., Zimpel, C., and Carneiro, C. (2016). *Pesquisa e Formação nos Sítios Arqueológicos Espinhara e Sol de Campinas do Acre – PESCA*. doi: 10.13140/RG.2.2.27534.72006.
- Prümers, H. (2014). Die frühen Siedler von Jasiaquiri. *Zeitschrift für Archäologie Außereuropäischer Kulturen* 6, 309–332.
- Prümers, H., and Jaimes Betancourt, C. (2014). 100 años de investigaciones arqueológicas en los Llanos de Mojos. *Arqueoantropológicas Año* 4, 11–53.

- Prümers, H., Jaimes Betancourt, C., and Plaza Martínez, R. (2006). Algunas tumbas prehispánicas de Bella Vista, Prov. Iténez, Bolivia. *Zeitschrift für Archäologie Außereuropäischer Kulturen* 1, 251–284.
- Robinson, M., Jaimes-Betancourt, C., Elliott, S., Maezumi, S. Y., Hilbert, L., Alves, D., et al. (2020). Anthropogenic soil and settlement organisation in the Bolivian Amazon. *Geoarchaeology* 36, 388–403. doi: <https://doi.org/10.1002/gea.21839>.
- Rodrigues, L., Lombardo, U., Fehr, S., Preusser, F., and Veit, H. (2015). Pre-Columbian agriculture in the Bolivian Lowlands: Construction history and management of raised fields in Bermeo. *CATENA* 132, 126–138. doi: 10.1016/j.catena.2014.08.021.
- Rodrigues, L., Lombardo, U., Trauerstein, M., Huber, P., Mohr, S., and Veit, H. (2016). An insight into pre-Columbian raised fields: the case of San Borja, Bolivian lowlands. *SOIL* 2, 367–389. doi: 10.5194/soil-2-367-2016.
- Saunaluoma, S. (2010). Pre-Columbian earthworks in the Riberalta region of the Bolivian Amazon. *Amazônica-Revista de Antropologia* 2.
- Saunaluoma, S., and Schaan, D. (2012). Monumentality in Western Amazonian formative societies: geometric ditched enclosures in the Brazilian state of Acre. *Antiqua* 2, e1. doi: 10.4081/antiqua.2012.e1.
- Schaan, D., Pärssinen, M., Saunaluoma, S., Ranzi, A., Bueno, M., and Barbosa, A. (2012). New radiometric dates for Precolumbian (2000-700 BP) earthworks in western Amazonia, Brazil. *Journal of Field Archaeology* 37, 132–142.
- Walker, J. (2000). Raised field abandonment in the upper Amazon. *Culture & Agriculture* 22, 27–31.
- Walker, J. H. (2004). *Agricultural change in the Bolivian Amazon*. Center for Comparative Archaeology.
- Walker, J. H. (2014). Reflections on archaeology, poverty and tourism in the Bolivian Amazon. *Worldwide Hospitality and Tourism Themes* 6, 215–228.
- Ziólkowski, M. S. (1994). Andes: radiocarbon database for Bolivia, Ecuador and Peru. (*No Title*).
